# Supplementary material for: Novel copolymers incorporating dithieno[3,2-b:2′,3′-d]thiophene moieties for air-stable and high performance organic field-effect transistors
Source: Royal Society of Chemistry journal article supplement (doi:10.1039/b801603h), 2008-01-01
Supplement: b801603h.pdf [file b801603h.pdf]

## Supporting Information

### Novel copolymers incorporating dithieno[3,2-*b*:2',3'-*d*]thiophene moieties for air-stable and high performance organic field-effect transistors

Kun Lu,<sup>ab</sup> Chong-an Di,<sup>ab</sup> Hongxia Xi,<sup>ab</sup> Yunqi Liu,<sup>\*a</sup> Gui Yu,<sup>a</sup> Wenfeng Qiu,<sup>a</sup> Hengjun Zhang,<sup>ab</sup> Xike Gao,<sup>ab</sup> Ying Liu,<sup>ab</sup> Ting Qi,<sup>ab</sup> Chunyan Du<sup>ab</sup> and Daoben Zhu<sup>a</sup>

<sup>a</sup> Beijing National Laboratory for Molecular Sciences, Key Laboratory of Organic Solids, Institute of Chemistry, Chinese Academy of Sciences, Beijing 100190, China

<sup>b</sup> Graduate School of Chinese Academy of Sciences, Beijing 100039, China

E-mail: liuyq@mail.iccas.ac.cn.

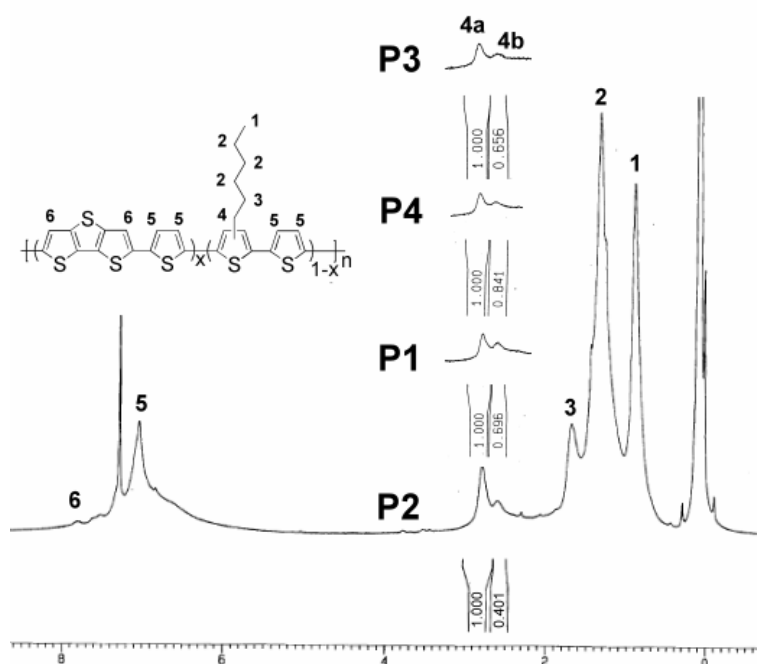

**Figure S1.** The <sup>1</sup>H NMR spectra of the copolymers.

**Table S1.** Electrochemical properties of the copolymers.

| Polymers  | $E_{ox}^{1/2}$<br>(V) | $E_{red}^{1/2}$<br>(V) | $E_{HOMO}$ (eV) | $E_{LUMO}$ (eV) | $E_g^{ec}$<br>(eV) | $E_g^{opt}$ <sup>a</sup><br>(eV) |
|-----------|-----------------------|------------------------|-----------------|-----------------|--------------------|----------------------------------|
| <b>P1</b> | 0.30                  | -2.14                  | -5.06           | -2.62           | 2.44               | 2.01                             |
| <b>P2</b> | 0.32                  | -2.15                  | -5.04           | -2.63           | 2.41               | 1.98                             |
| <b>P3</b> | 0.42                  | -2.17                  | -5.11           | -2.59           | 2.52               | 2.00                             |
| <b>P4</b> | 0.38                  | -2.17                  | -5.08           | -2.60           | 2.48               | 1.95                             |

a. The optical band gap was obtained from the equation  $E_g^{opt} = 1240/\lambda_{edge}$ , where  $\lambda_{edge}$  is the onset value of absorption spectrum in long wavelength direction.

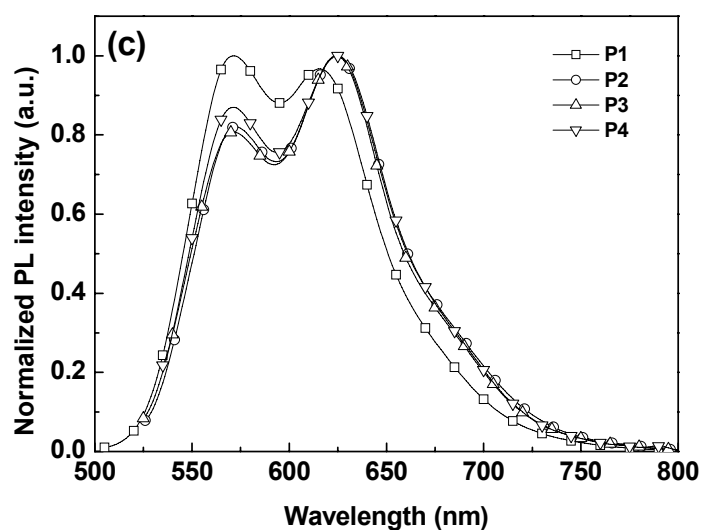

**Figure S2.** Photoluminescence spectra of the copolymer dilute solutions in chloroform.

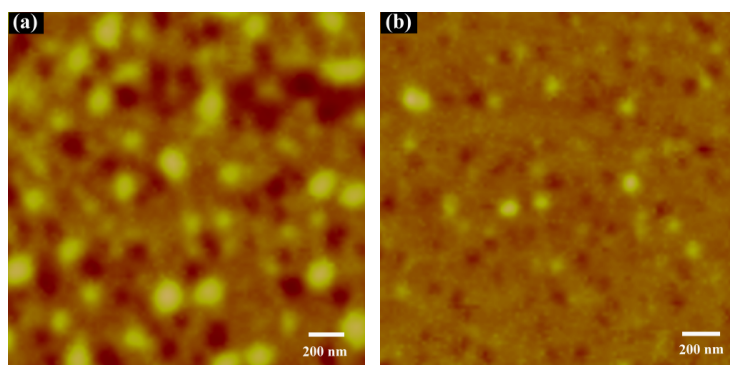

**Figure S3.** AFM images of films by spin coating: a) **P1** solutions onto OTS-modified SiO<sub>2</sub>/Si substrate annealing at 170 °C for 30 min and b) **P2** solutions onto OTS-modified SiO<sub>2</sub>/Si substrate annealing at 170 °C for 30 min.

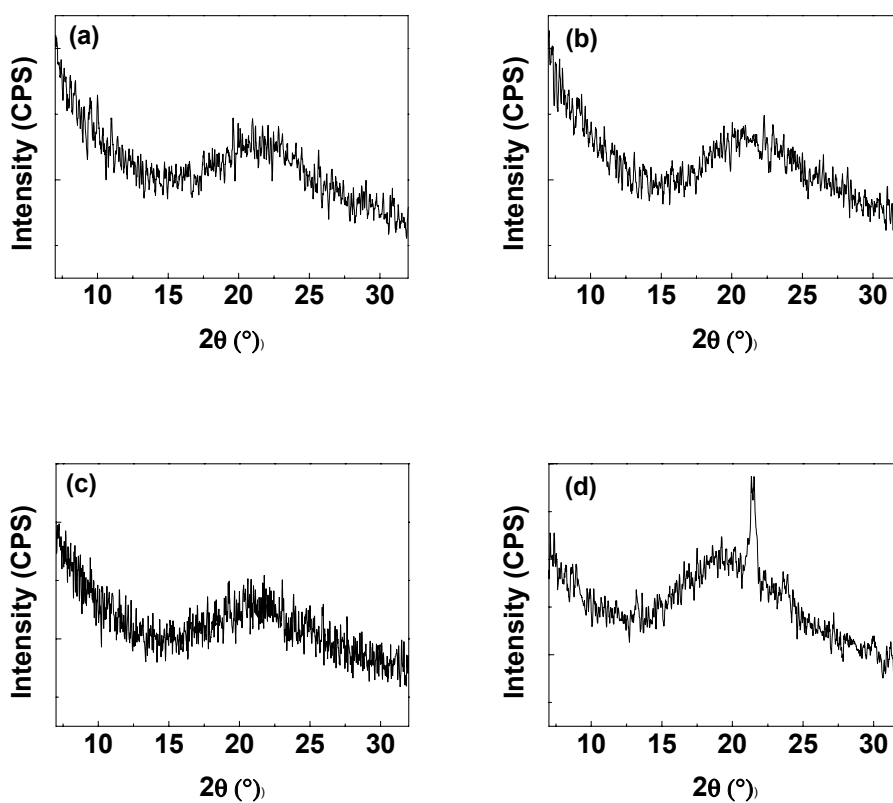

**Figure S4.** XRD patterns of untreated thin films: (a) for **P1**, (b) for **P2**, (c) for **P3** and (d) for **P4** solution spun coated on OTS-modified SiO<sub>2</sub>/Si substrates.

**Table S2.** FET properties of devices by spin coating polymer solutions onto bare SiO<sub>2</sub>

and OTS-modified SiO<sub>2</sub> substrates.

|           | Bare SiO <sub>2</sub> |                     |       | OTS-modified SiO <sub>2</sub> |                     |       |         |                     |       |
|-----------|-----------------------|---------------------|-------|-------------------------------|---------------------|-------|---------|---------------------|-------|
|           | $\mu$                 | $I_{\text{on/off}}$ | $V_G$ | R.T.                          |                     |       | 170 ° C |                     |       |
|           |                       |                     |       | $\mu$                         | $I_{\text{on/off}}$ | $V_G$ | $\mu$   | $I_{\text{on/off}}$ | $V_G$ |
| <b>P1</b> | $4 \times 10^{-5}$    | 800                 | -12   | $1.7 \times 10^{-4}$          | $10^3$              | -28   | [-]     | [-]                 | [-]   |
| <b>P2</b> | $6.8 \times 10^{-5}$  | 100                 | -31   | $4.1 \times 10^{-4}$          | $10^3$              | -5    | [-]     | [-]                 | [-]   |
| <b>P3</b> | $5.1 \times 10^{-4}$  | $10^3$              | -2.1  | $3.5 \times 10^{-4}$          | $10^3$              | 6.2   | 0.016   | $3 \times 10^4$     | -5.5  |
| <b>P4</b> | $7.6 \times 10^{-4}$  | $10^3$              | -2.3  | $2.7 \times 10^{-4}$          | $10^3$              | -6.5  | 0.012   | $10^4$              | -4.7  |

[-]: not measured for the films became un-continuous.

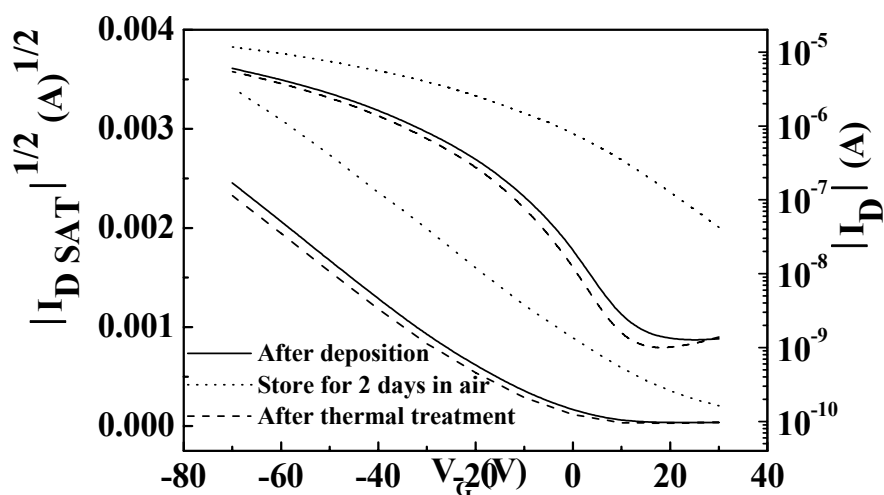

**Figure S5.** FET performance of device based on **P3** stored at ambient conditions with about 40% humidity and performance of device after second thermal treated.
